# Supplementary material for: CuO/Mn2O3 heterojunction for efficient electrochemical nitrate reduction to ammonia
Source: Royal Society of Chemistry journal article supplement (doi:10.1039/d4nj02277g), 2024-01-01
Supplement: d4nj02277g1.pdf [file d4nj02277g1.pdf]

## Supporting information

### **CuO/Mn<sub>2</sub>O<sub>3</sub> heterojunction catalyst for efficient electrocatalytic nitrate reduction to ammonia**

Xuetao Cheng, Huilin Zhao, Chao Fan, Yun Duan and Yan-Qin Wang\*

Inner Mongolia Key Laboratory of Chemistry and Physics of Rare Earth Materials,  
College of Chemistry and Chemical Engineering, Inner Mongolia University, 24  
Zhaojun Road, Hohhot 010021, P. R. China  
E-mail: yqwang\_chem@imu.edu.cn

## 1. Experimental

### Materials:

Carbon cloth (CC) was purchased from Shanghai Xianren Instrument and Meter Co., Ltd,  $\text{CuSO}_4$ ,  $\text{MnSO}_4 \cdot \text{H}_2\text{O}$ , urea, potassium nitrate, potassium hydroxide, Potassium nitrate- $^{15}\text{N}$  were purchased from Shanghai Maclin Biochemical Technology Co., Ltd. All chemicals were not proceeded for further purification and treatment.

## 2. Experimental Section

**Synthesis of  $\text{CuO}/\text{Mn}_2\text{O}_3$ :** Carbon cloth (CC) was pretreated before use. The specific steps were as follows: first, CC was cut into 2 cm \* 2 cm and soaked in concentrated nitric acid, and heated in an oil bath at 80°C for 8 hours. Then, CC was rinsed several times with deionized water and alcohol. 0.264 g (1.65 mmol)  $\text{CuSO}_4$ , 0.262 g (1.65 mmol)  $\text{MnSO}_4 \cdot \text{H}_2\text{O}$  and 0.198 g (3.3 mmol) urea were added into 15 mL of deionized water and sonicated for 5 minutes to completely dissolve, which was added into a 20 mL Teflon autoclave with a piece of above pretreated CC. The autoclave was sealed and heated in an oven at 135°C for 12 hours, which the obtained product was then annealed at 500°C in a muffle furnace for two hours, and the finally obtained product was named as  $\text{CuO}/\text{Mn}_2\text{O}_3$ .

**Synthesis of  $\text{CuO}$  and  $\text{Mn}_2\text{O}_3$ :** The preparation of  $\text{CuO}$  and  $\text{Mn}_2\text{O}_3$  was similar to that of  $\text{CuO}/\text{Mn}_2\text{O}_3$ , except that the reactant was replaced by only  $\text{CuSO}_4$  or  $\text{MnSO}_4 \cdot \text{H}_2\text{O}$  during the synthesis process, and the corresponding obtained product was named as  $\text{CuO}$  or  $\text{Mn}_2\text{O}_3$ .

## 3. Material characterization

X-ray diffraction (XRD) measurements were performed by a PANalytical Empyrean diffractometer at a scanning rate of 0.013° in the Bragg angle ranging from 5° to 80° with  $\text{Cu K}\alpha$  radiation ( $\lambda = 1.5418 \text{ \AA}$ ). X-ray photoelectron spectroscopy (XPS) measurements were performed by a VG Scientific ESCALAB Mark II spectrometer equipped with two ultrahigh vacuum (UHV) chambers. All spectra were calibrated with the C-C peak of  $\text{C}1s$  orbitals as 284.8 eV. Scanning electron

micrographs were measured by a QUANTA430 field emission scanning electron microscope (FE-SEM). Transmission electron microscopy and scanning transmission electron microscopy characterizations were performed on an FEL-Tecnai G220 field-emission transmission electron microscope (FE-TEM). Ultraviolet-visible (UV-Vis) spectroscopy data were measured by using a UV-Vis-NIR spectrometer (Cary 5000) with an integrating sphere unit and automation of reflectance measurement unit, and the measurements were corrected by baseline/blank correction with dark correction.  $^1\text{H}$  NMR spectra were recorded at a Bruker NMR instrument (600 MHz), chemical shifts were reported in ppm using tetramethylsilane as an internal standard in  $d$ -DMSO solvent.

### **Electrochemical measurements of nitrate reduction reaction ( $\text{NO}_3\text{RR}$ )**

The electrochemical measurements were carried out using a CHI 660E electrochemical workstation in a H-type electrolytic cell separated by a Nafion 211 membrane.  $\text{CuO}/\text{Mn}_2\text{O}_3$  catalysts,  $\text{Hg}/\text{HgO}$  and platinum foil were used as the working electrode, reference electrode and counter electrode, respectively. 40 mL of 0.1 M KOH and 0.1 M  $\text{KNO}_3$  solution were added into the cathode and anode chambers for  $\text{NO}_3^-$  reduction. Before the  $\text{ENO}_3\text{RR}$  experiment, high purity Argon gas (99.99%) was fed into the electrolyte for 15 minutes. Then the LSV (linear scanning voltammetry) measurements were proceeded at a rate of  $5 \text{ mV s}^{-1}$  ( $-0.2 \sim -1.2 \text{ V vs. RHE}$ ). Furthermore, the  $i$ - $t$  (one-hour chronoamperometry) test was applied to investigate ammonia yield and Faraday efficiency (FE) at five different potentials. All potentials were referenced to the reversible hydrogen electrode (RHE) based on the Nernst equation ( $E_{\text{RHE}} = E_{\text{SCE}} + 0.0591 \times \text{pH} + 0.098$ ).

### **Determination of ion concentration**

The ultraviolet-visible (UV-Vis) spectrophotometer was used to detect the ion concentration of pre- and post-tested electrolytes after diluting to appropriate concentration to match the range of calibration curves. The specific test methods are as follows:

### **Determination of ammonia**

Ammonia-N was determined using salicylic acid-potassium sodium citrate

chromogenic reagent as the color reagent. First, a certain amount of electrolyte was taken out from the electrolytic cell and diluted to 2 mL to the detection concentration range. Next, 2 mL salicylic acid-potassium sodium citrate chromogenic reagent was added into the diluted electrolyte, and mixed thoroughly. Then, 1 mL sodium hypochlorite and 0.2 mL sodium nitroprusside solution were put into the above solution. Then, the above-mentioned mixed solution was tested with a UV-Vis spectrophotometer in the wavelength range of 800 ~ 500 nm, and the absorbance values at 655 nm was recorded. The concentration-absorbance curve was calibrated using a series of standard ammonium chloride solutions.

#### **Determination of $\text{NO}_3^-$**

Firstly, a certain amount of electrolyte was taken out from the electrolytic cell and diluted to 5 mL. Then, 0.6 mL 1 M HCl and 0.01 mL 0.8 wt% sulfamic acid solution were added into the aforementioned solution. The absorption spectrum was measured using a UV-Vis spectrophotometer and the absorption intensity at wavelengths of 220 and 275 nm were recorded. The final absorbance was calculated using the following formula:  $A = A_{220\text{nm}} - 2A_{275\text{nm}}$ . The concentration-absorbance curve was calibrated using a series of standard potassium nitrate solutions.

#### **Determination of $\text{NO}_2^-$**

Color reagent was a mixture of p-aminobenzenesulfonamide (0.1 g), N-(1-naphthyl) ethylenediamine dihydrochloride (0.01 g), deionized water (5 mL) and phosphoric acid (0.294 mL,  $\rho = 1.685 \text{ g mL}^{-1}$ ). First, the electrolyte was diluted to the detection concentration range. Subsequently, 1 mL color reagent was added into the diluted electrolyte in a colorimetric cuvette. After shaking and standing for 10 minutes, the absorbance was measured at 540 nm using UV-Vis spectrophotometer, and then the concentration of  $\text{NO}_2^-$  was calculated from the calibration curve. Calibration curves were obtained using a series of standard concentration  $\text{NaNO}_2$  solutions.

#### **Determination of $\text{N}_2\text{H}_4$**

First, a certain amount of electrolyte was taken out from the electrolytic cell and diluted to 2 mL to the detection concentration range. Subsequently, 1 mL color reagent was added into the diluted electrolyte in a colorimetric cuvette. Color reagent

was a mixture of anhydrous ethanol (50 mL), HCl (5 mL) and p-C<sub>9</sub>H<sub>11</sub>NO (1 g). The absorption intensity at a wavelength of 455 nm using UV-Vis spectrophotometer was recorded after standing for 20 min.

#### Isotope Labeling Experiments

K<sup>15</sup>NO<sub>3</sub> was used as the feeding N-source to perform the isotopic labeling nitrate reduction experiments to verify the source of ammonia. 0.1 M KOH was used as the electrolyte, and K<sup>15</sup>NO<sub>3</sub> with a concentration of 0.1 M <sup>15</sup>NO<sub>3</sub><sup>-</sup> was added into the cathode compartment as the reactant. After electroreduction, electrolyte with obtained <sup>15</sup>NH<sub>4</sub><sup>+</sup> was taken out and the pH value was adjusted to be weak acidic with 1 M HCl for qualitative analysis by <sup>1</sup>H NMR (600 MHz) with external standards of maleic acid.

#### 4. Supporting Figures and Table

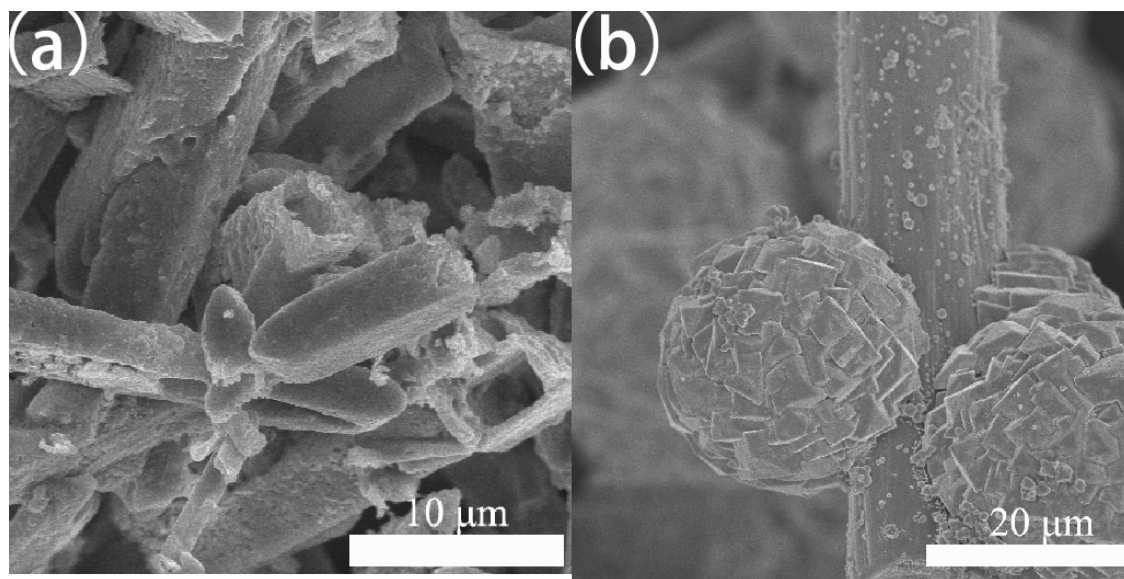

**Fig. S1.** SEM images of (a) CuO, (b) Mn<sub>2</sub>O<sub>3</sub>.

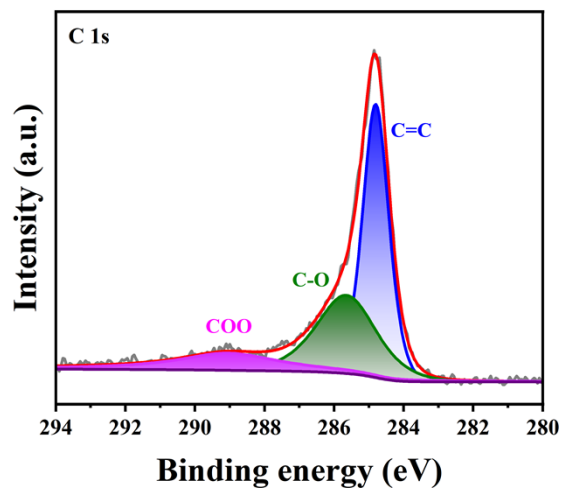

**Fig. S2.** The high-resolution XPS spectra of C1s

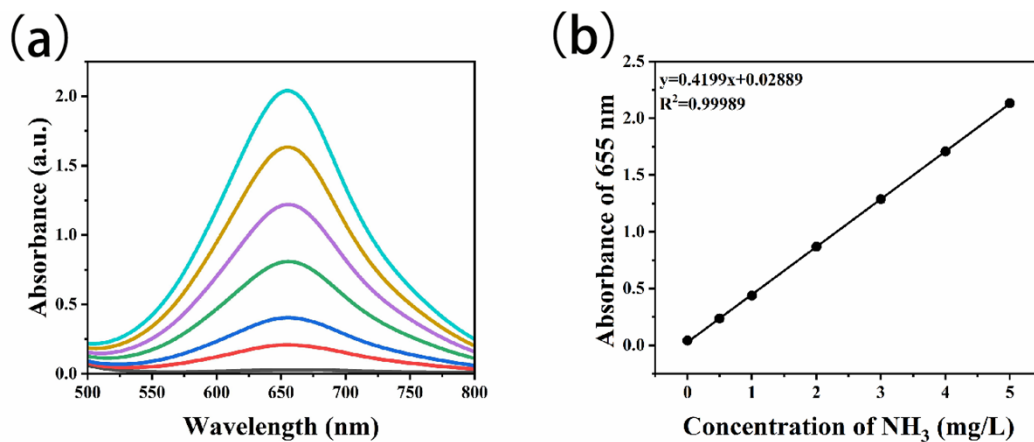

**Fig. S3.** (a) UV-Vis absorption spectra for various concentrations of  $\text{NH}_4^+$  ions. (b) Calibration curve used to estimate the concentration of  $\text{NH}_4^+$  ions.

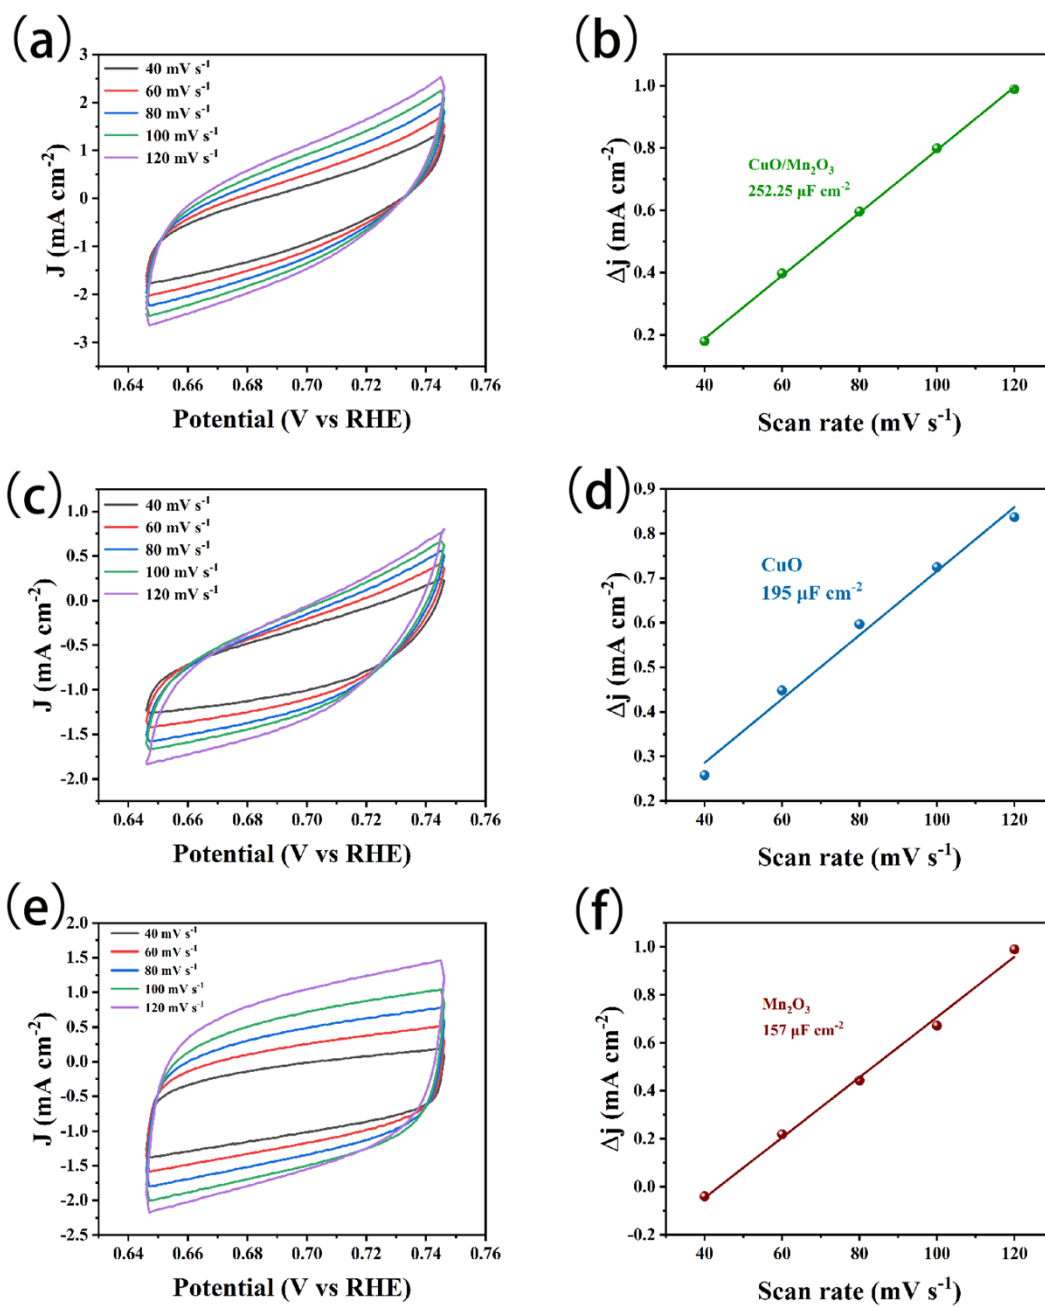

**Fig. S4.** (a) The CV curves and (b) the determination of double layer capacitance of  $\text{Cu/Mn}_2\text{O}_3$  at different scan rates. (c) The CV curves and (d) the determination of double layer capacitance of  $\text{CuO}$  at different scan rates. (e) The CV curves and (f) the determination of double layer capacitance of  $\text{Mn}_2\text{O}_3$  at different scan rates.

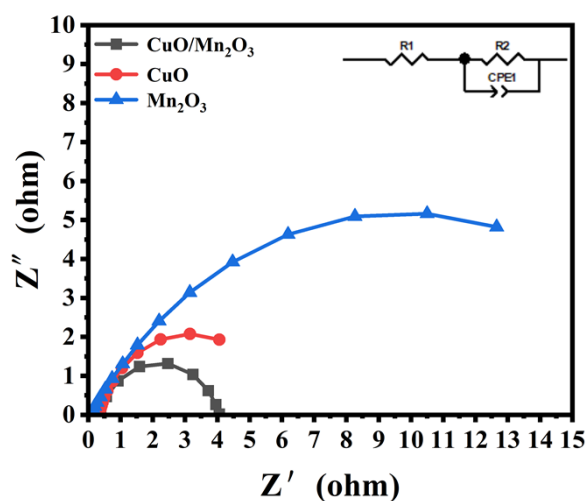

**Fig. S5.** Nyquist plots of CuO/Mn<sub>2</sub>O<sub>3</sub>, CuO and Mn<sub>2</sub>O<sub>3</sub> at -0.7 V (vs. RHE) in 0.1 M KOH solution.

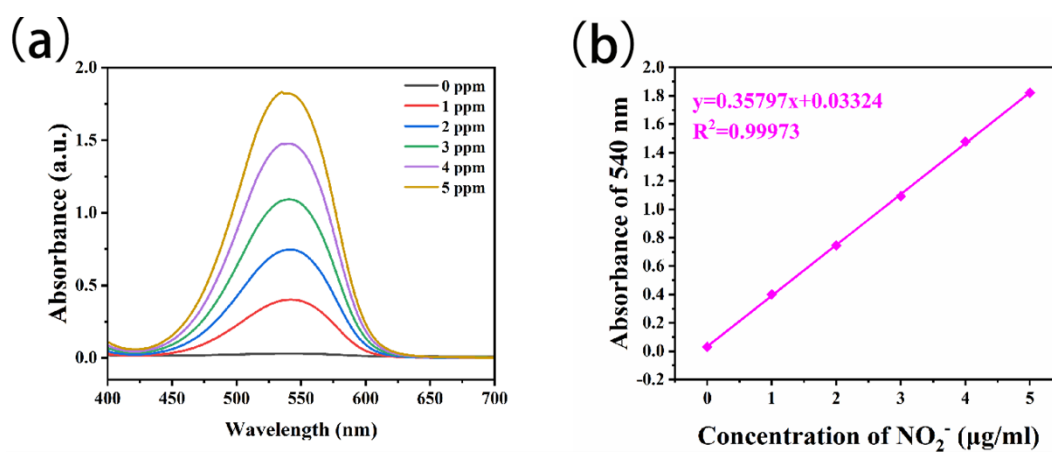

**Fig. S6.** (a) UV-Vis absorption spectroscopies for various concentrations of NO<sub>2</sub><sup>-</sup> ions. (b) Calibration curve used to estimate the concentration of NO<sub>2</sub><sup>-</sup> ions.



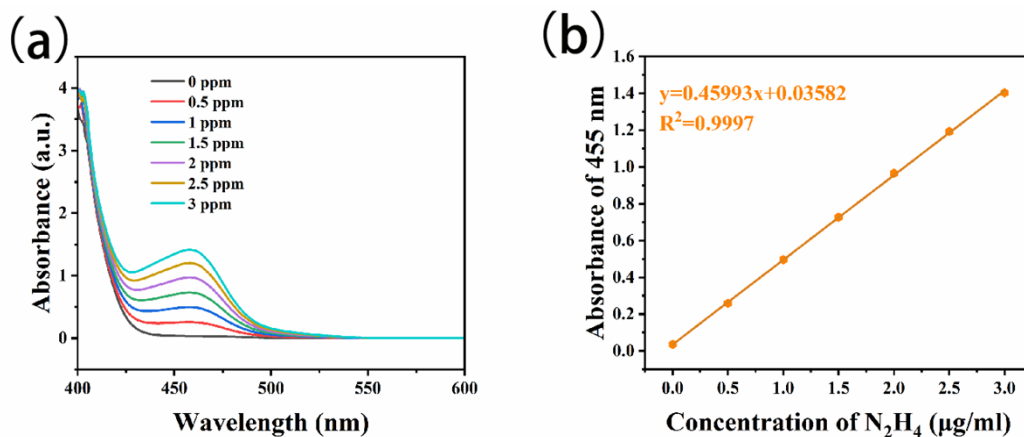

**Fig. S7.** (a) UV-Vis absorption spectroscopies for various concentrations of  $\text{N}_2\text{H}_4$ . (b) Calibration curve used to estimate the concentration of  $\text{N}_2\text{H}_4$ .

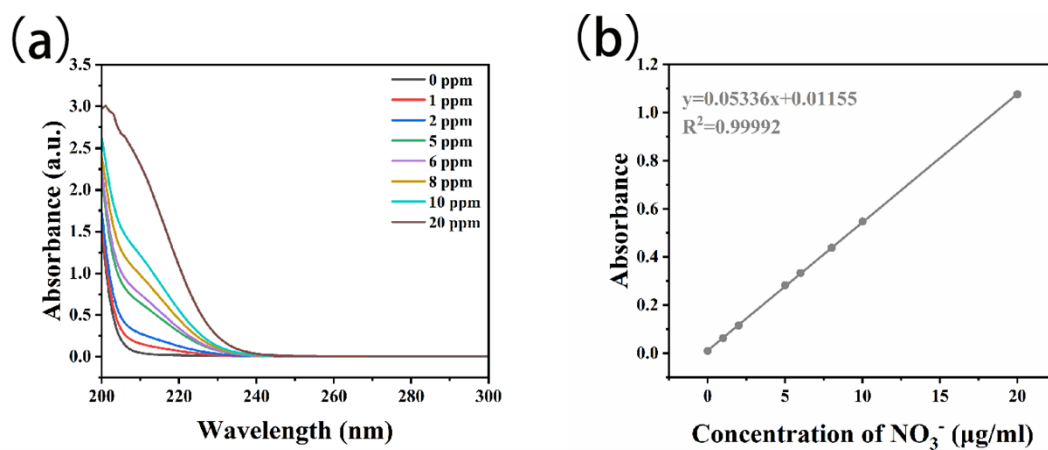

**Fig. S8.** (a) UV-Vis absorption spectroscopies for various concentrations of  $\text{NO}_3^-$  ions. (b) Calibration curve used to estimate the concentration of  $\text{NO}_3^-$  ions.

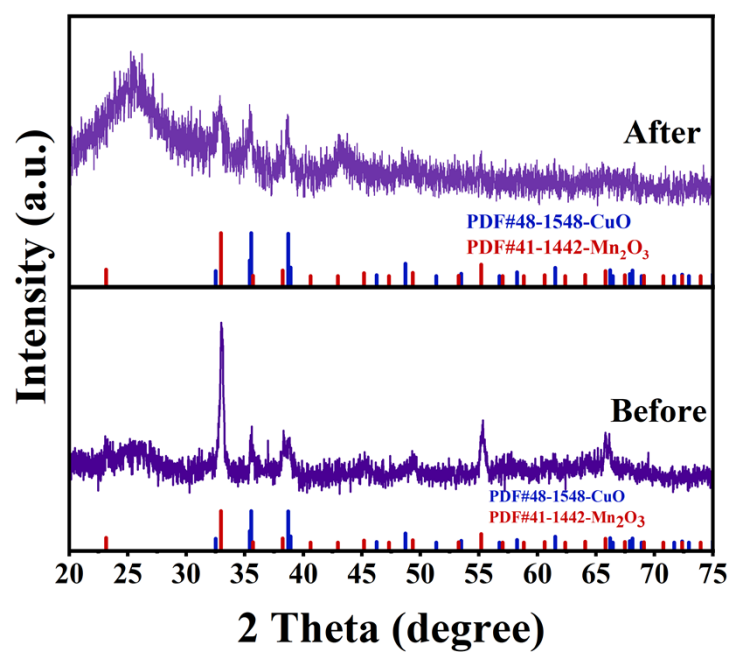

**Fig. S9.** XRD patterns of CuO/Mn<sub>2</sub>O<sub>3</sub> before and after NO<sub>3</sub>RR testing.

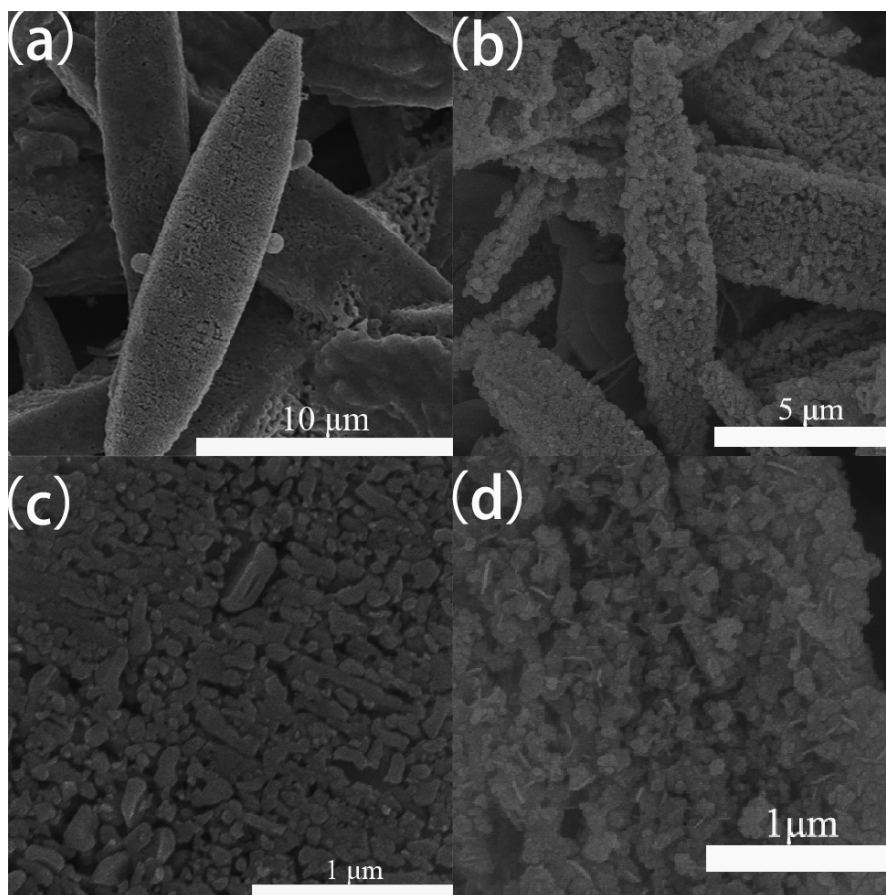

**Fig. S10.** SEM images of CuO/Mn<sub>2</sub>O<sub>3</sub> before (a), (c) and after (b), (d) NO<sub>3</sub>RR tests.

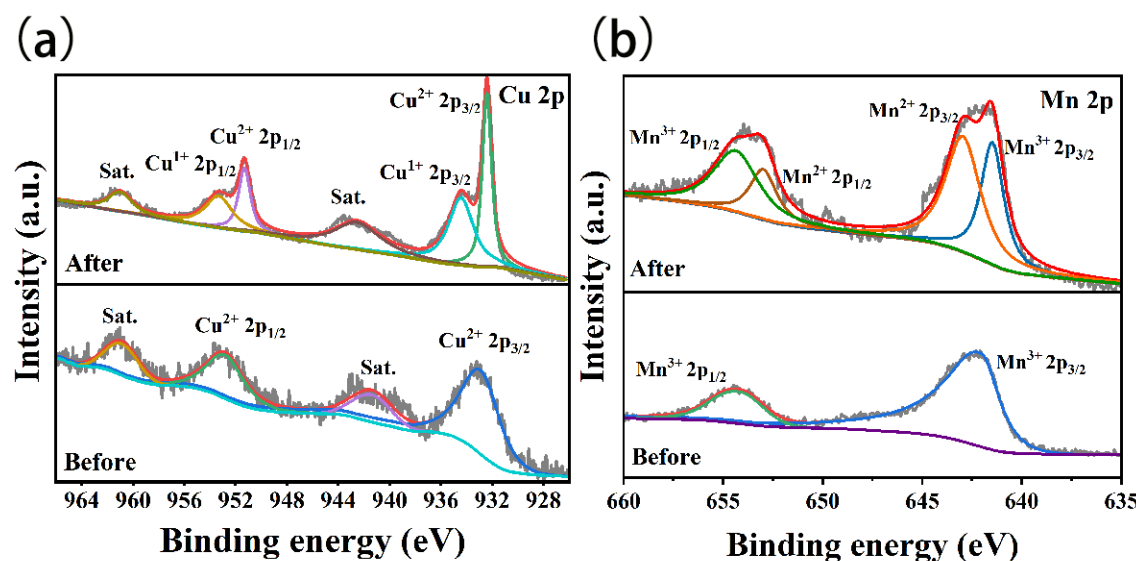

**Fig. S11.** The high-resolution XPS spectra of CuO/Mn<sub>2</sub>O<sub>3</sub> before (a), and after cycle tests (b).

**Fig. S1.** A comparison of the NO<sub>3</sub>RR performance of CuO/Mn<sub>2</sub>O<sub>3</sub> with the electrocatalysts recently reported in literature in alkaline medium.

| Catalyst                            | Electrolyte                              | NH <sub>3</sub> yield<br>(mg h <sup>-1</sup> cm <sup>-2</sup> ) | FE <sub>NH3</sub> | Potential<br>(vs. RHE) | Ref          |
|-------------------------------------|------------------------------------------|-----------------------------------------------------------------|-------------------|------------------------|--------------|
| CuO/Mn <sub>2</sub> O <sub>3</sub>  | 1 M KOH<br>(0.1 M KNO <sub>3</sub> )     | 12.99                                                           | 98.44%            | -0.7 V                 | This<br>work |
| Fe-V <sub>2</sub> O <sub>5</sub>    | 1.0 M KOH (0.1<br>M KNO <sub>3</sub> )   | 12.5                                                            | 97.1%             | -0.7 V                 | [1]          |
| CoP/CC                              | 1 M NaOH<br>(2 mM NaNO <sub>3</sub> )    | 0.32                                                            | 65%               | -0.4 V                 | [2]          |
| CoO@NCN                             | 0.1 M NaOH (0.1<br>M NaNO <sub>3</sub> ) | 9.04                                                            | 93.8%             | -0.6 V                 | [3]          |
| 30Cu-Co <sub>3</sub> O <sub>4</sub> | 0.1 M KOH (0.1<br>M NaNO <sub>3</sub> )  | 9.9                                                             | 92.4%             | -0.4 V                 | [4]          |

|                                     |                            |            |        |         |      |  |  |
|-------------------------------------|----------------------------|------------|--------|---------|------|--|--|
|                                     | M KNO <sub>3</sub> )       |            |        |         |      |  |  |
| Cu@Ni <sub>2</sub> P-               | 1 M KOH                    | 6.36       | 94.63% | -0.2 V  | [5]  |  |  |
| NF                                  | (20 mM KNO <sub>3</sub> )  |            |        |         |      |  |  |
| Cu@B-                               | 0.1 M KOH                  | (0.1 9.35  | 94.6%  | -0.77 V | [6]  |  |  |
| SnS <sub>2-x</sub>                  | M KNO <sub>3</sub> )       |            |        |         |      |  |  |
| Ru-                                 | 0.1 M KOH                  | (0.1 2.18  | 48.3%  | -0.7 V  | [7]  |  |  |
| Cu/Cu <sub>2</sub> O@T              | M KNO <sub>3</sub> )       |            |        |         |      |  |  |
| i <sub>3</sub> C <sub>2</sub>       |                            |            |        |         |      |  |  |
| Cu@ZnO                              | 0.1 M KOH                  | (0.05 6.03 | 89.14% | -0.6 V  | [8]  |  |  |
| NWA                                 | M KNO <sub>3</sub> )       |            |        |         |      |  |  |
| MWCNTs                              | 0.1 M KOH                  | (0.1 4.03  | 84.72% | -0.16 V | [9]  |  |  |
|                                     | M KNO <sub>3</sub> )       |            |        |         |      |  |  |
| CoS <sub>2</sub> /MoS <sub>2</sub>  | 0.1 M KOH                  | 7.5        | 97.07% | -0.25 V | [10] |  |  |
|                                     | (600ppm KNO <sub>3</sub> ) |            |        |         |      |  |  |
| GDY-MnO <sub>x</sub>                | 0.1 M KOH                  | (0.1 6.5   | 95.4%  | -0.9 V  | [11] |  |  |
|                                     | M KNO <sub>3</sub> )       |            |        |         |      |  |  |
| i-                                  | 1 M KOH                    | (0.1 M 4.3 | 94.3%  | -0.25 V | [12] |  |  |
| Ag/Co <sub>3</sub> O <sub>4</sub> N | KNO <sub>3</sub> )         |            |        |         |      |  |  |
| Ws                                  |                            |            |        |         |      |  |  |

## References

- [1] N. N. Zhang, G. K. Zhang, P. Shen, H. Zhang, D. W. Ma, K. Chu, *Adv. Funct. Mater.*, 2023, **33**, 2211537
- [2] H. Zhang, G. Q. Wang, C. J. Wang, Y. L. Liu, Y. Yang, C. X. Wang, W. M. Jiang, L. M. Fu, J. Xu, *J. Electroanal. Chem.*, 2022, **910**, 116171.
- [3] Q. R. Chen, J. Liang, L. C. Yue, Y. S. Luo, Q. Liu, N. Li, A. A. Alshehri, T. S. Li, H. R. Guo, X. P. Sun, *Chem. Commun.*, 2022, **58**, 5901 – 5904.
- [4] M. He, R. Chen, Y. Zhong, H. Li, S. Chen, C. Zhang, S. Deng, F. Gao, *Colloid Surfaces.*, 2024, **681**, 132746.

- [5] M. Li, L. P. Sun, L. H. Huo and H. Zhao , *Appl. Catal. A.* , 2024, **676**, 119650.
- [6] H. Li, Y. Z. Wang, S. H. Chen, F. Peng and F. M. Gao, *Small*, . 2024, 2308182.
- [7] F. Zhao, G. X. Li, Q. Q. Hua, J. H. Cao, J. l. Song, L. G. Gao, T. l. Ma, X. F. Ren and A. M. Liu, *Catal. Sci. Technol.*, 2023, **13**, 5543 – 5548.
- [8] A. l. Feng, Y. D. Hu, X. X. Yang, H. J. Lin, Q. Wang, J. Xu, A. M. Liu, G. Wu and Q. Y. Li, *ACS Catal.* , 2024, **14**, **8**, 5911 – 5923.
- [9] M. H. Ye, X. l. Jiang, Y. G. Zhang, Y. Liu, Y. X. Liu and L. Zhao, *Nanomaterials*, . 2024, **14**, 102.
- [10] Z. X. Tan, F. Du, M. q. Tong, J. d. Hu, N. Zhang, S. y. Huang and C. X. Guo, *Energy Fuels.* , 2023, **37**, **23**, 18085 – 18092.
- [11] X. Y. Luan, L. Qi, Z. Q. Zheng, S. Y. Zhao, Y. Q. Gao, Y. R. Xue and Y. l. Li, *Chem. Commun.* , 2023, **59**, 7611.
- [12] S. l. Wu, Y. Y. Jiang, W. J. Luo, P. Xu, L. L. Huang, Y. W. Du, H. Wang, X. M. Zhou, Y. J. Ge, J. J. Qian, H. G. Nie and Z. Yang, *Adv. Sci.* , 2023,**10**, 2303789.
